# Supplementary material for: Hetero-bis(σ-aryl)dirhodium(III) caprolactamates. Electronic communication between aryl groups through dirhodium(III)
Source: Royal Society of Chemistry journal article supplement (doi:10.1039/b821592h), 2009-01-01

## **Supplementary Information**

### **Hetero-bis( $\sigma$ -aryl)dihodium (III) Caprolactamates. Electronic Communication Between Aryl Groups Through Dihodium(III)**

**Jian-Hua Xie, Lei Zhou, Conrad Lubek, and Michael P. Doyle \***

*Department of Chemistry and Biochemistry, University of Maryland, College Park, Maryland 20742, USA*

### NMR spectra of hetero-bis( $\sigma$ -aryl)dirhodium(III) caprolactamates (**1**)

*trans*-{ $\sigma$ -Phenyl- $\sigma$ -(4-methoxycarbonylphenyl)}-tetrakis- $\mu$ -(caprolactamato) dirhodium(III)

(**1a**).

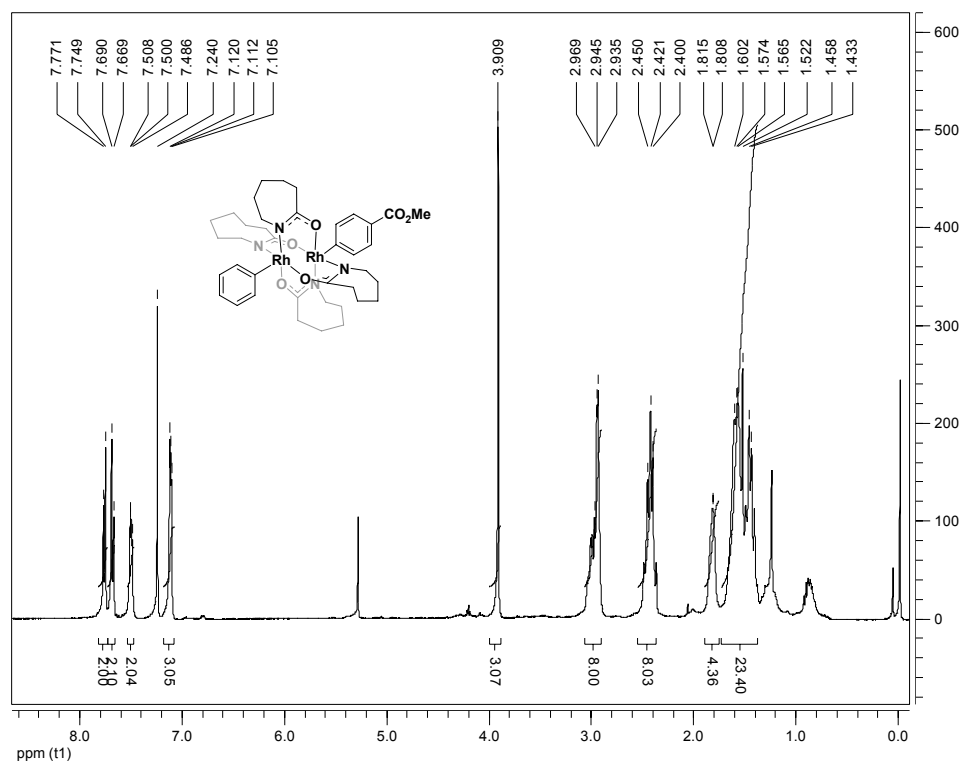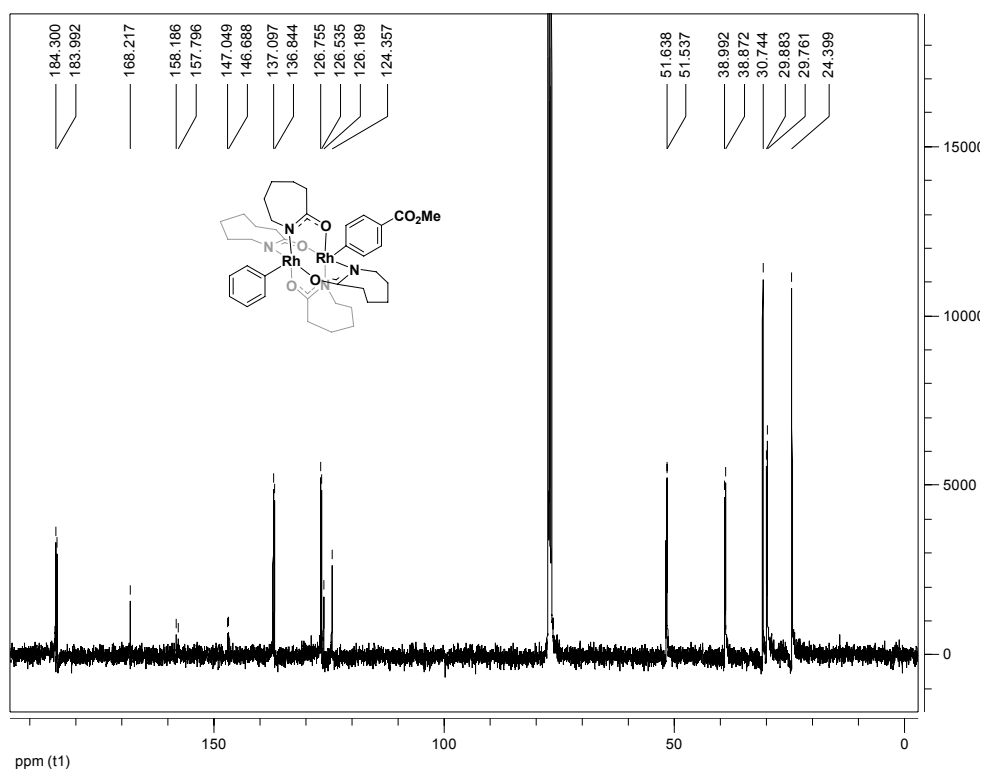

***trans*-{ $\sigma$ -(4-Methylphenyl)- $\sigma$ -(4-methoxycarbonylphenyl)}-*tetrakis- $\mu$* -  
(caprolactamato) dirhodium(III) (1b).**

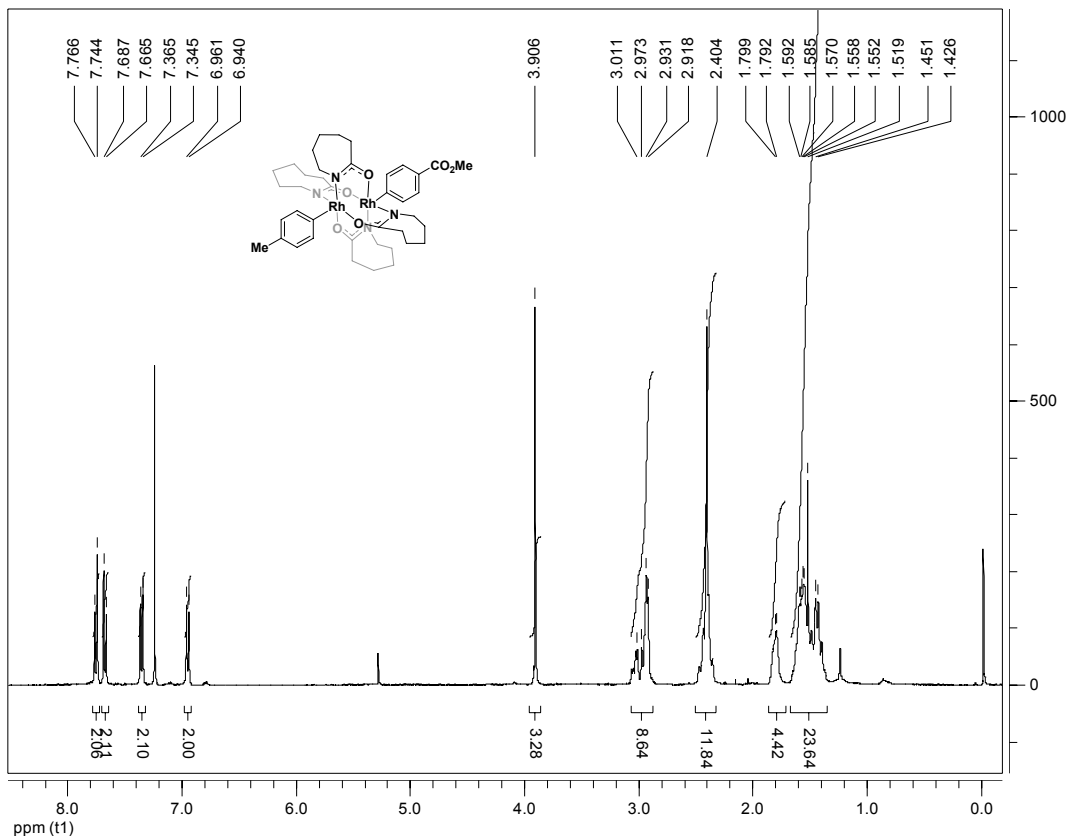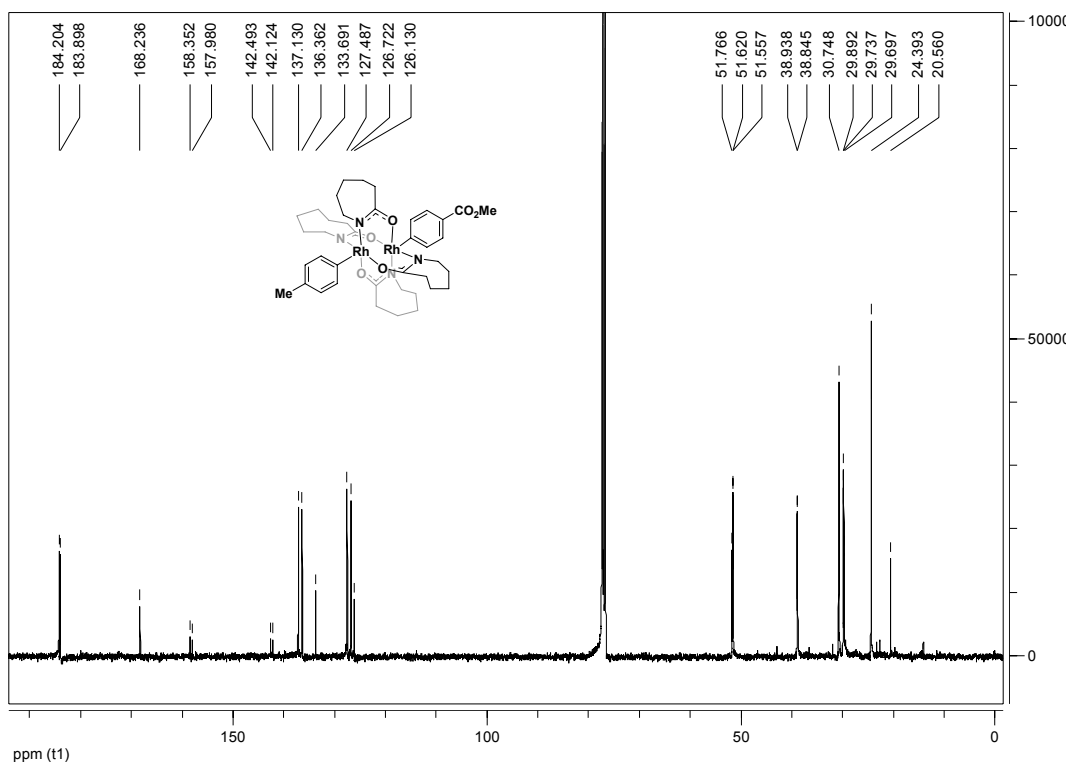

***trans*-{ $\sigma$ -(4-Phenylphenyl)- $\sigma$ -(4-methoxycarbonylphenyl)}-*tetrakis*- $\mu$ -  
(caprolactamato) dirhodium(III) (1c).**

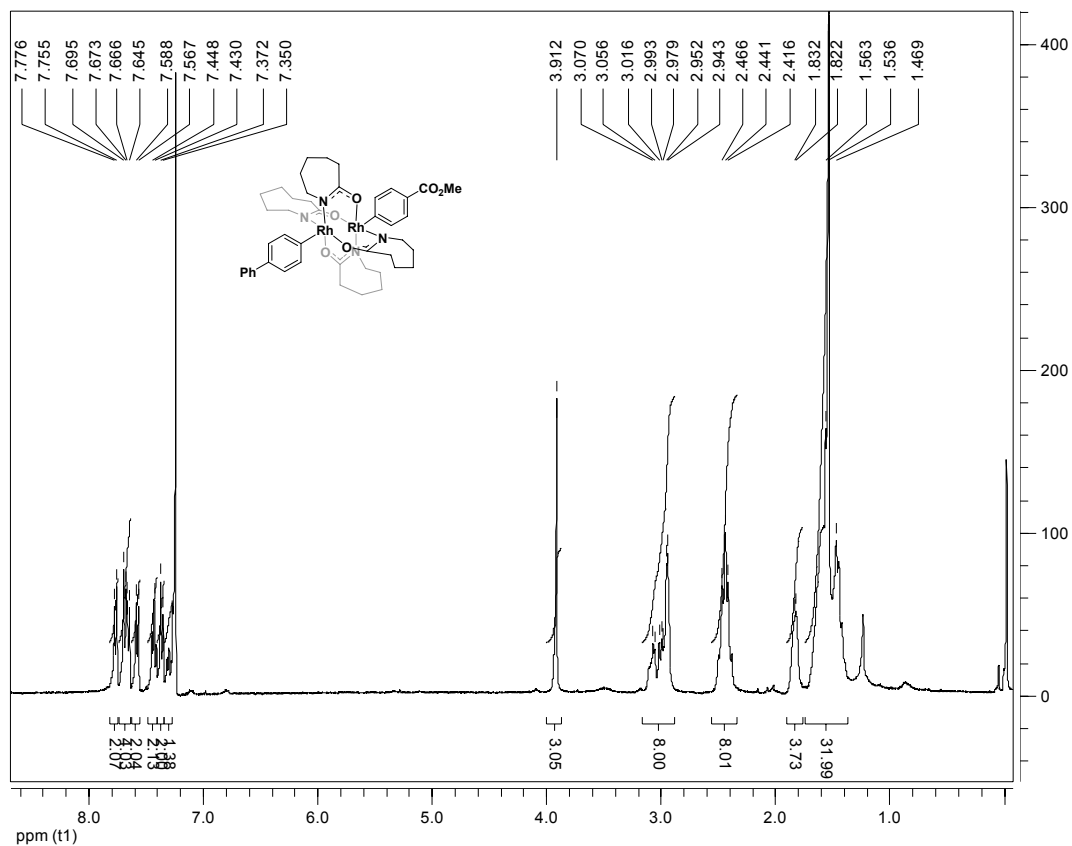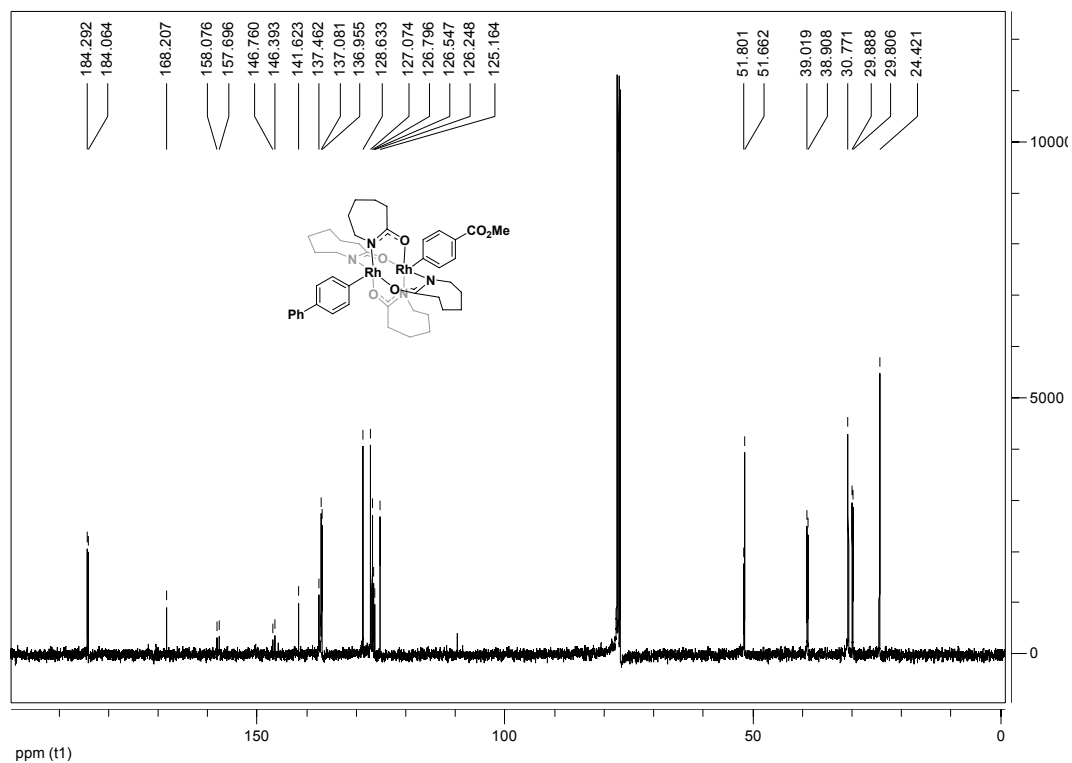

***trans***-{ $\sigma$ -(6-Methoxynaphthalen-2-yl)- $\sigma$ -(4-methoxycarbonylphenyl)}-*tetrakis*- $\mu$ -**(caprolactamato) dirhodium(III) (1d).**

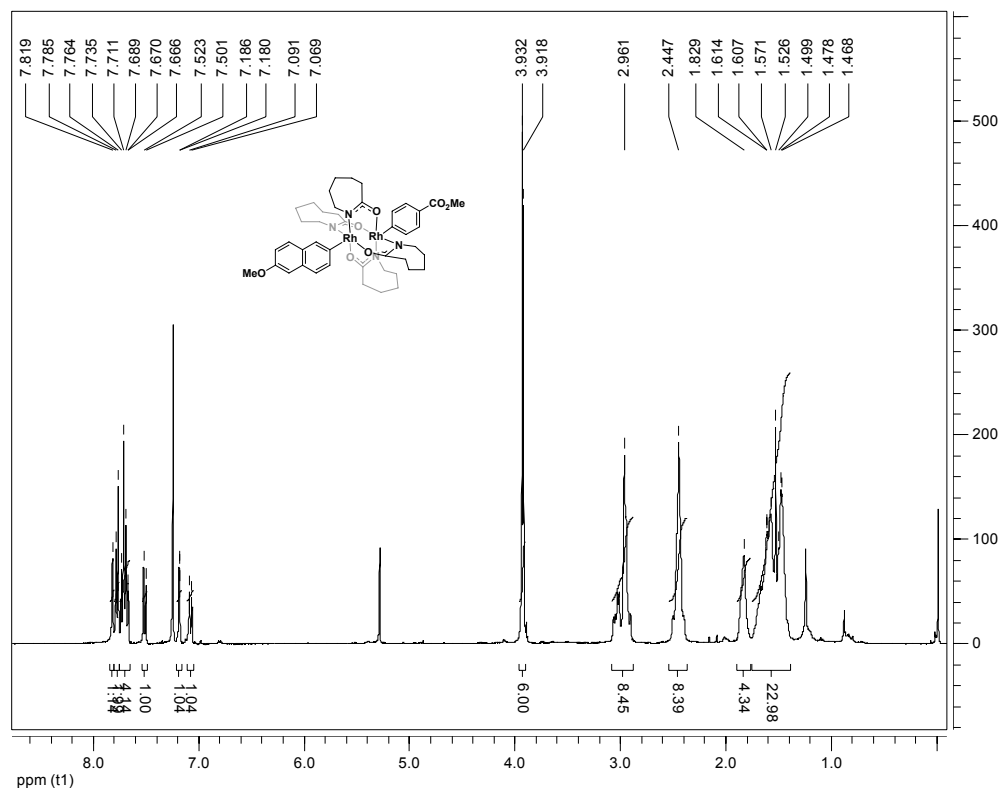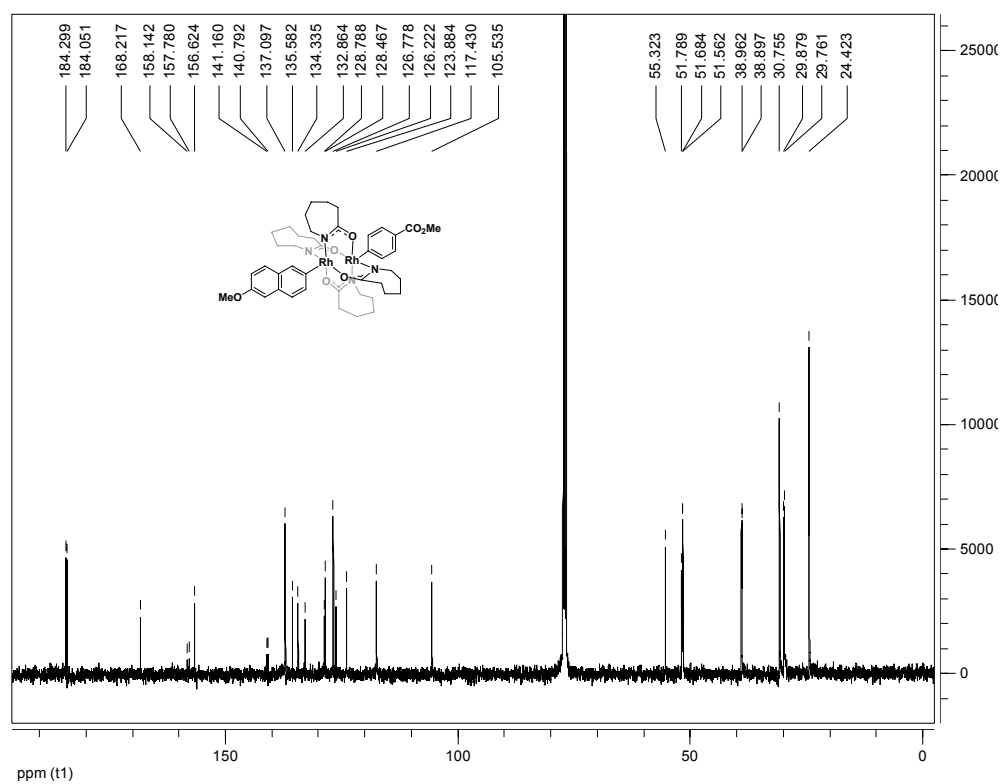

***trans*-{ $\sigma$ -(4-Bromophenyl)- $\sigma$ -(4-methoxycarbonylphenyl)}-*tetrakis*- $\mu$ -  
(caprolactamato) dirhodium(III) (1e).**

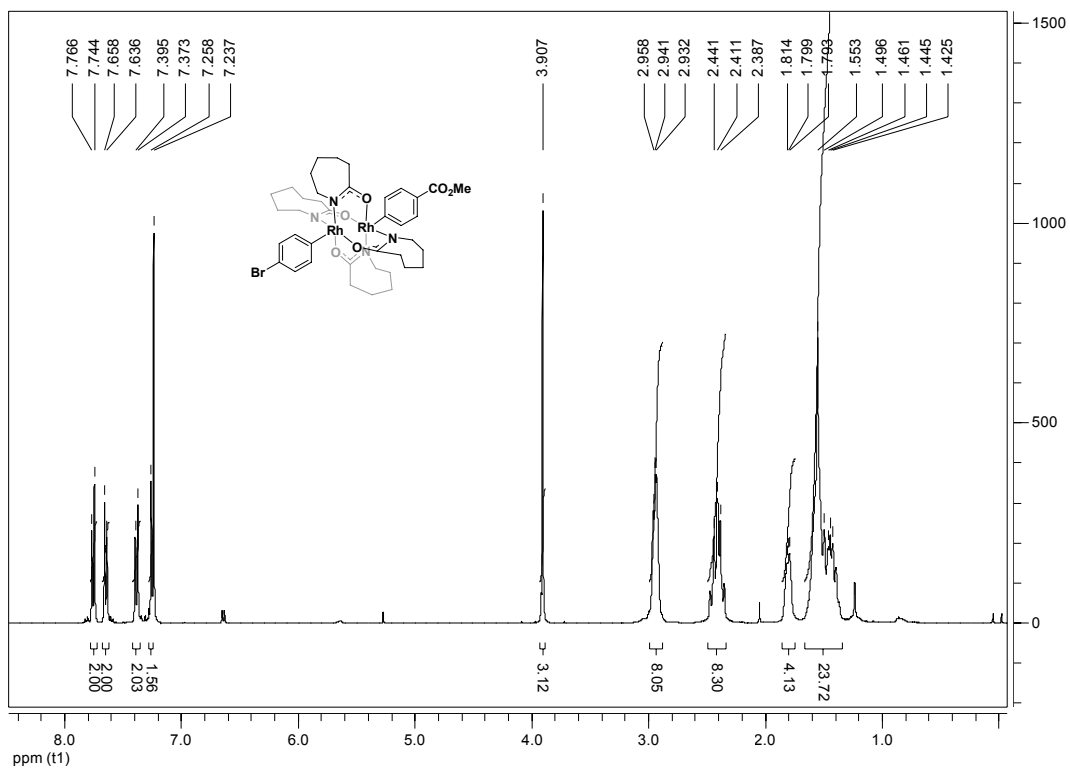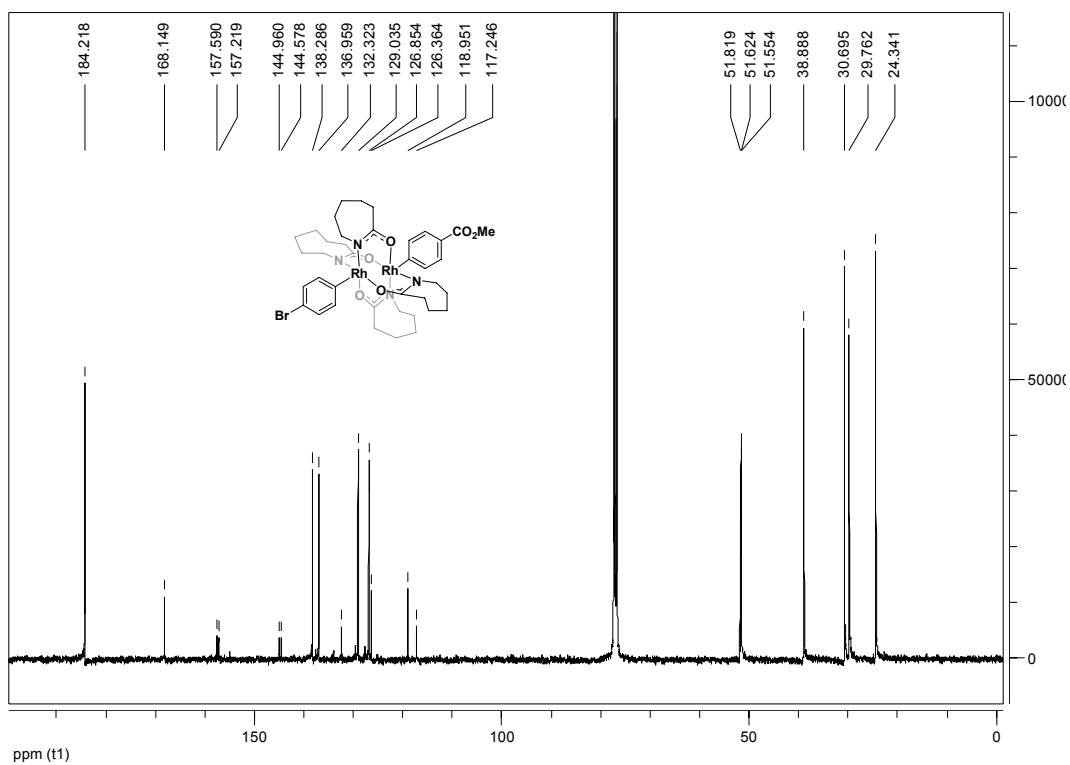



***trans*-{ $\sigma$ -(4-Trifluoromethylphenyl)- $\sigma$ -(4-methoxycarbonylphenyl)}-tetrakis- $\mu$ -  
(caprolactamato) dirhodium(III) (1g).**

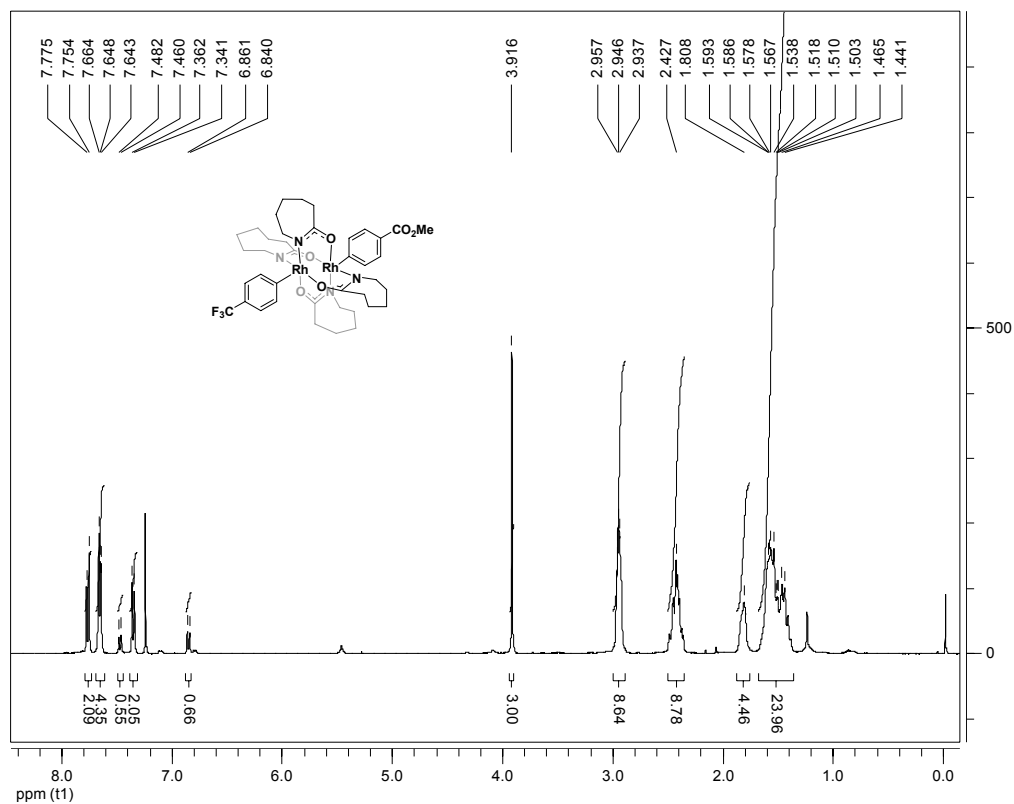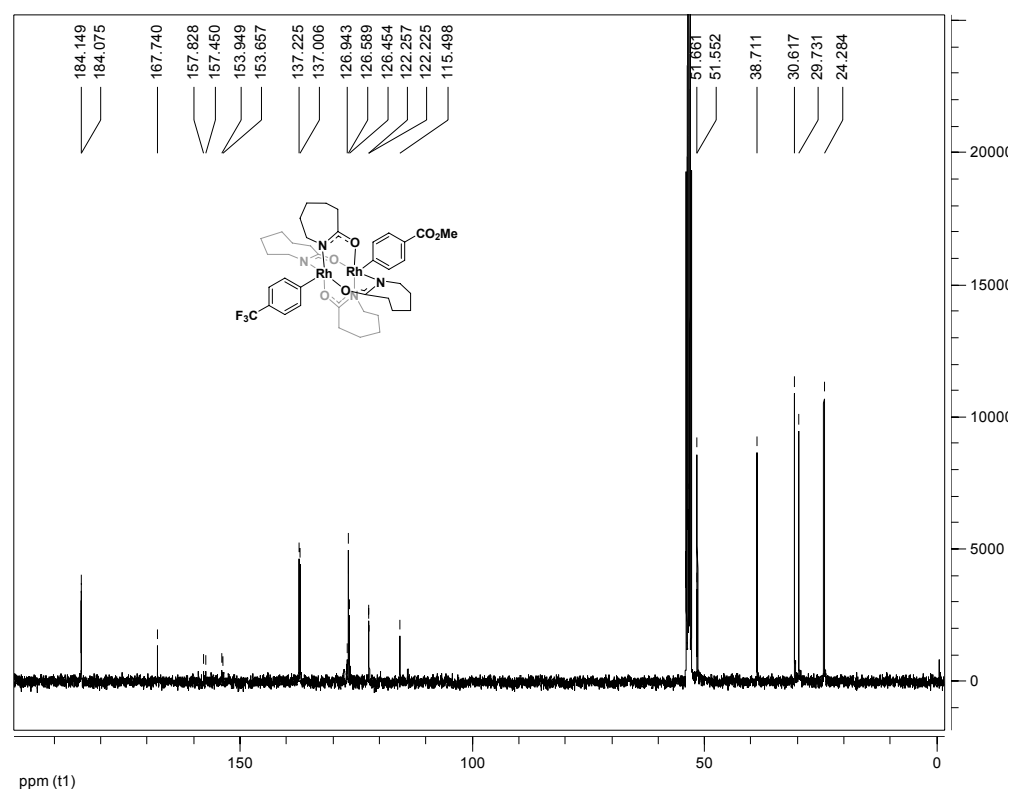



***trans*-{ $\sigma$ -(3-Nitrophenyl)- $\sigma$ -(4-methoxycarbonylphenyl)}-*tetrakis*- $\mu$ -(caprolactamato) dirhodium(III) (**1h**).**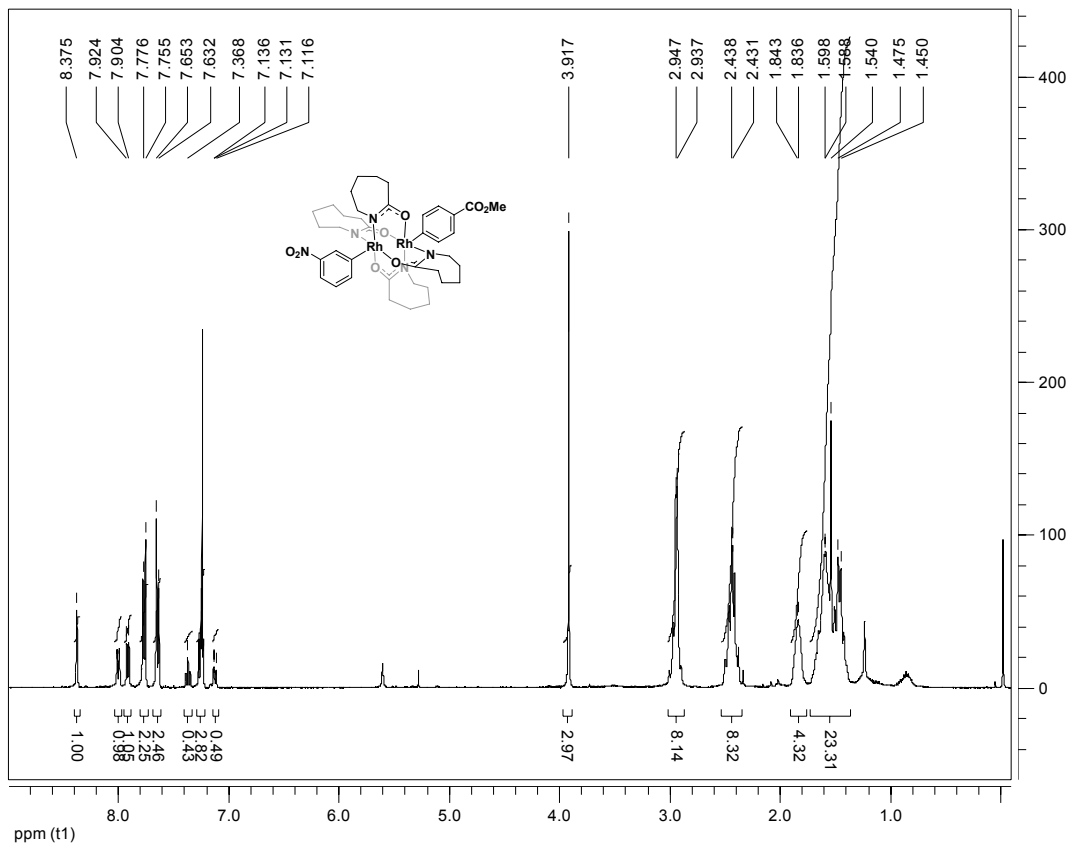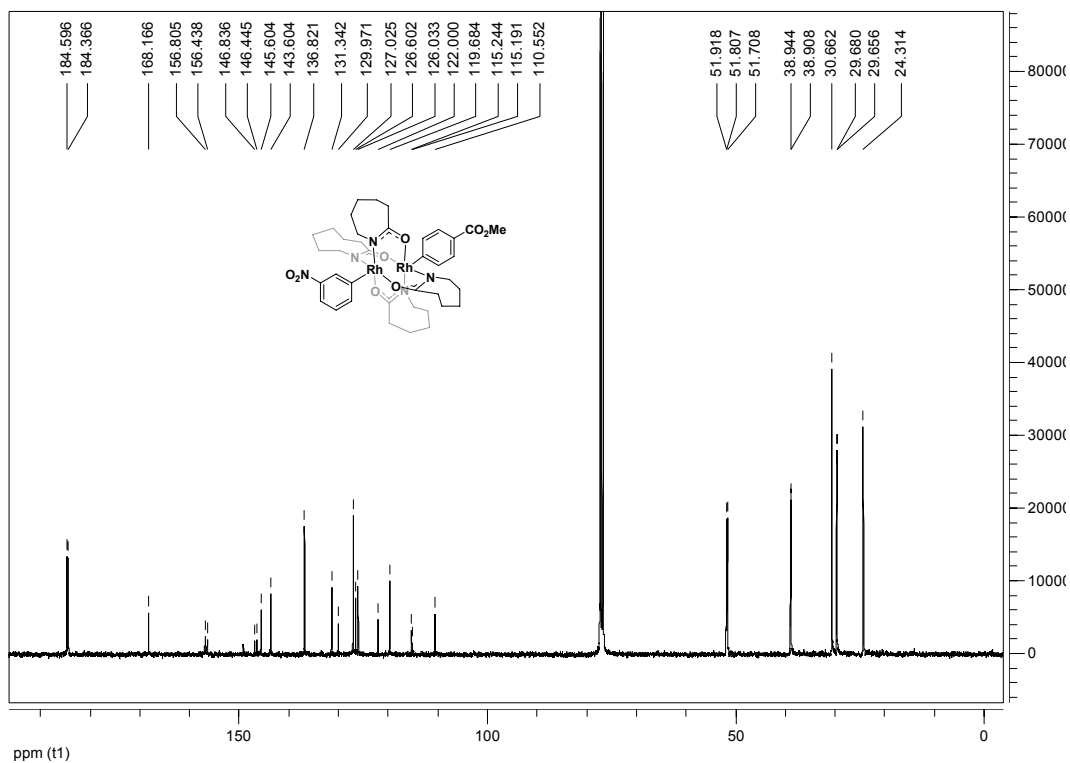

***trans*-{ $\sigma$ -(4-*N,N*-Dimethylaminophenyl)- $\sigma$ -phenyl}-*tetrakis*- $\mu$ -(caprolactamato)dirhodium(III) (1i).**

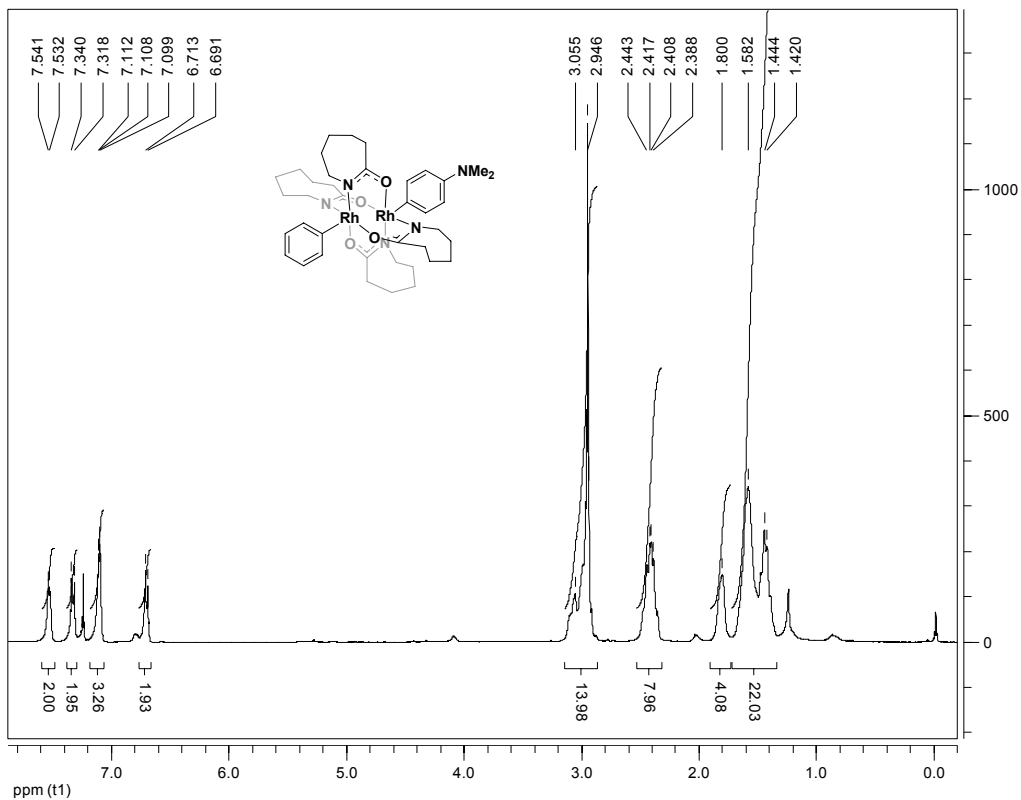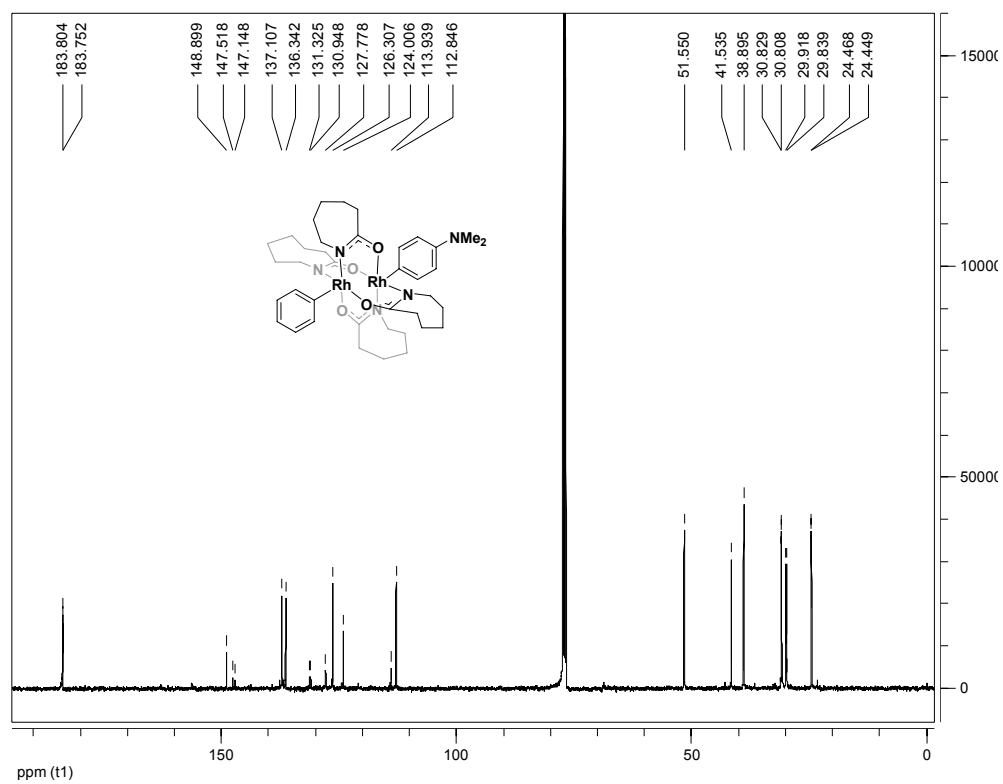

***trans*-{ $\sigma$ -(4-Methoxyphenyl)- $\sigma$ -phenyl}-*tetrakis*- $\mu$ -(caprolactamato) dirhodium(III)**

**(1j).**

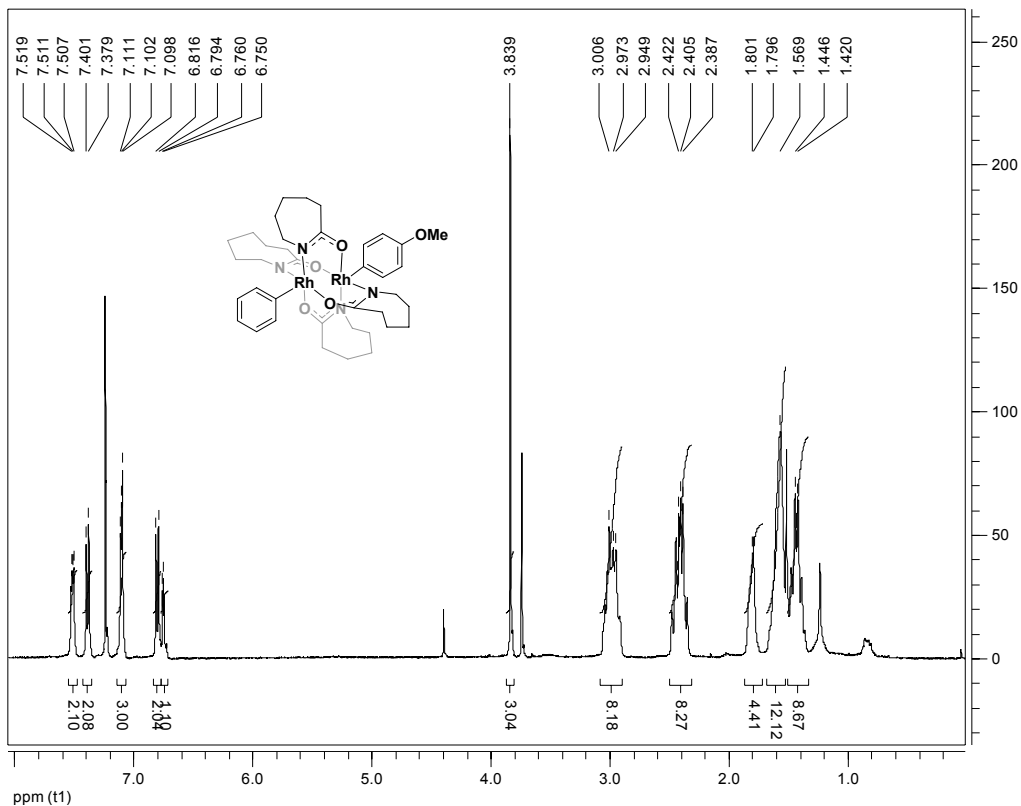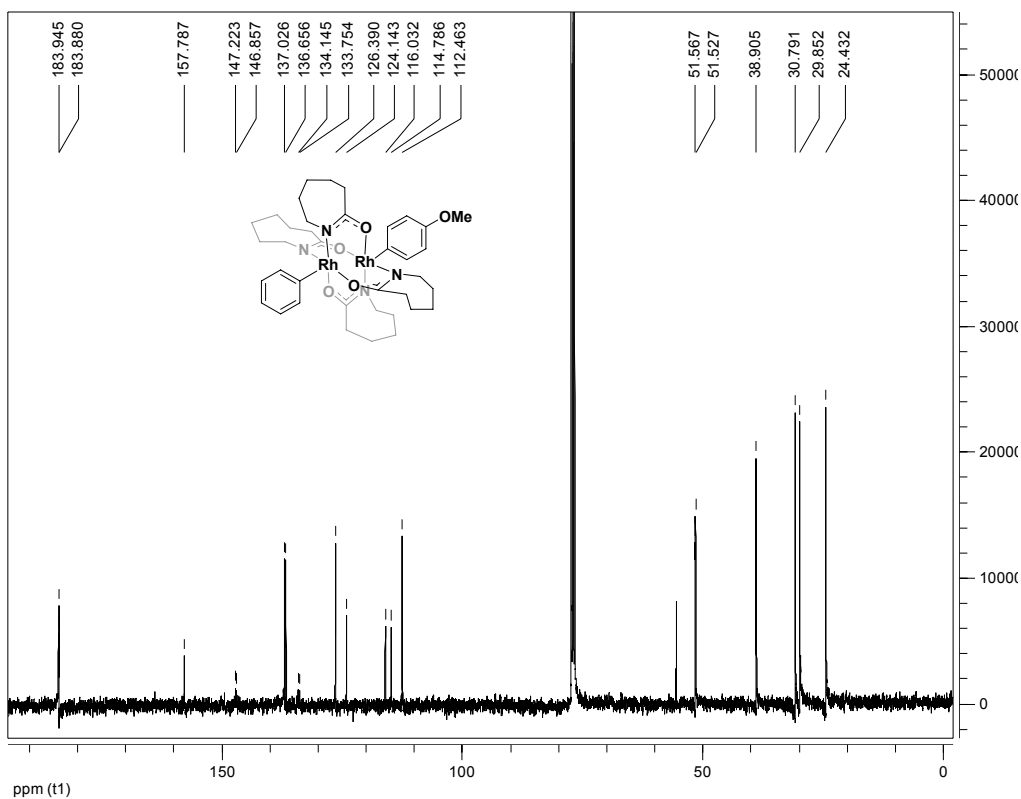

***trans*-{ $\sigma$ -(4-Formylphenyl)- $\sigma$ -phenyl}-*tetrakis*- $\mu$ -(caprolactamato)dirhodium(III) (1k).**

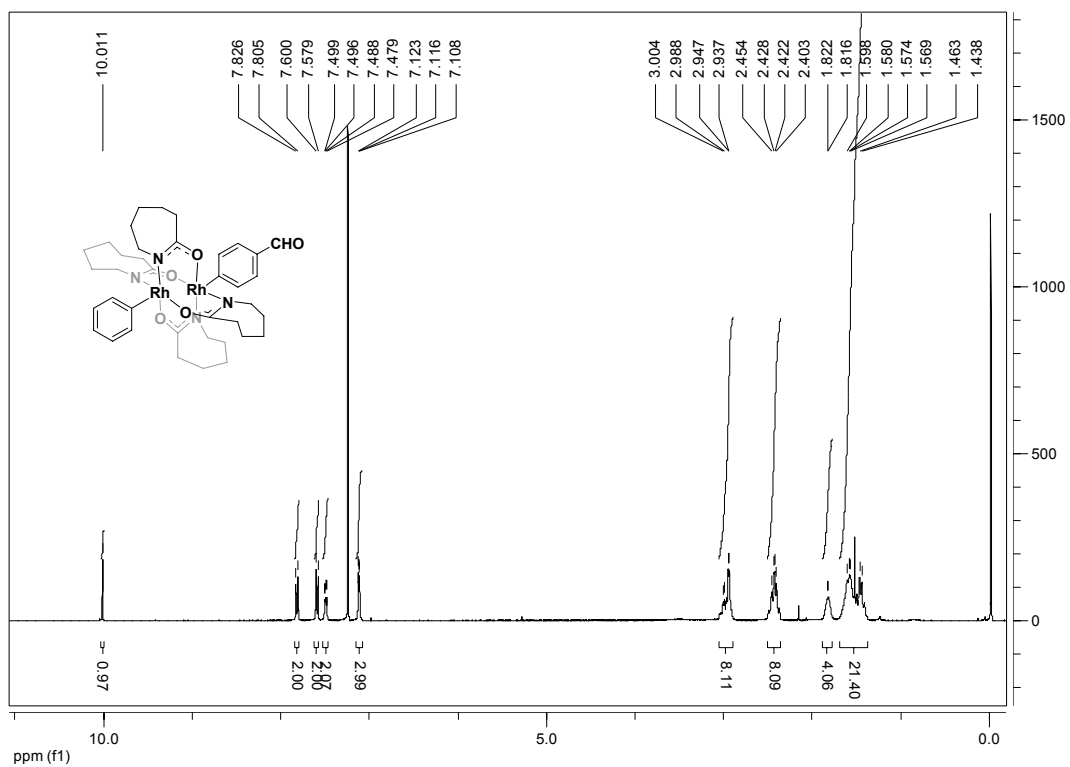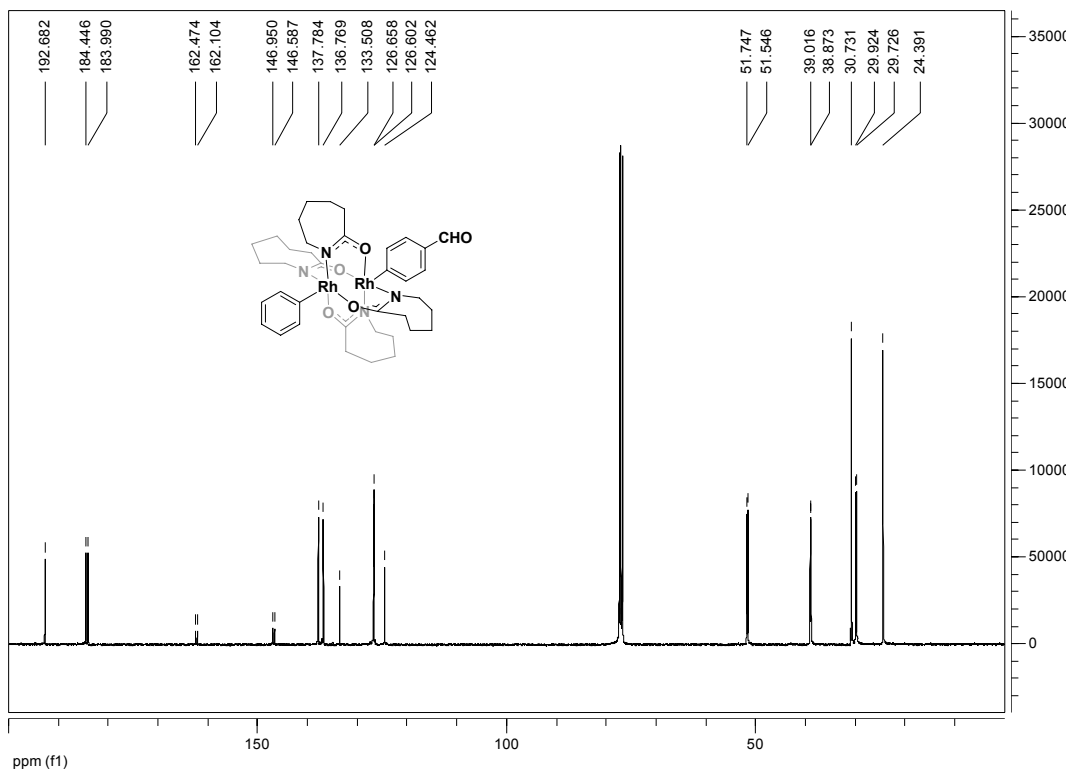

***trans*-{ $\sigma$ -(4-Methoxyphenyl)- $\sigma$ -(4-formylphenyl)}-*tetrakis*- $\mu$ -(caprolactamato) dirhodium(III) caprolactamate (11).**

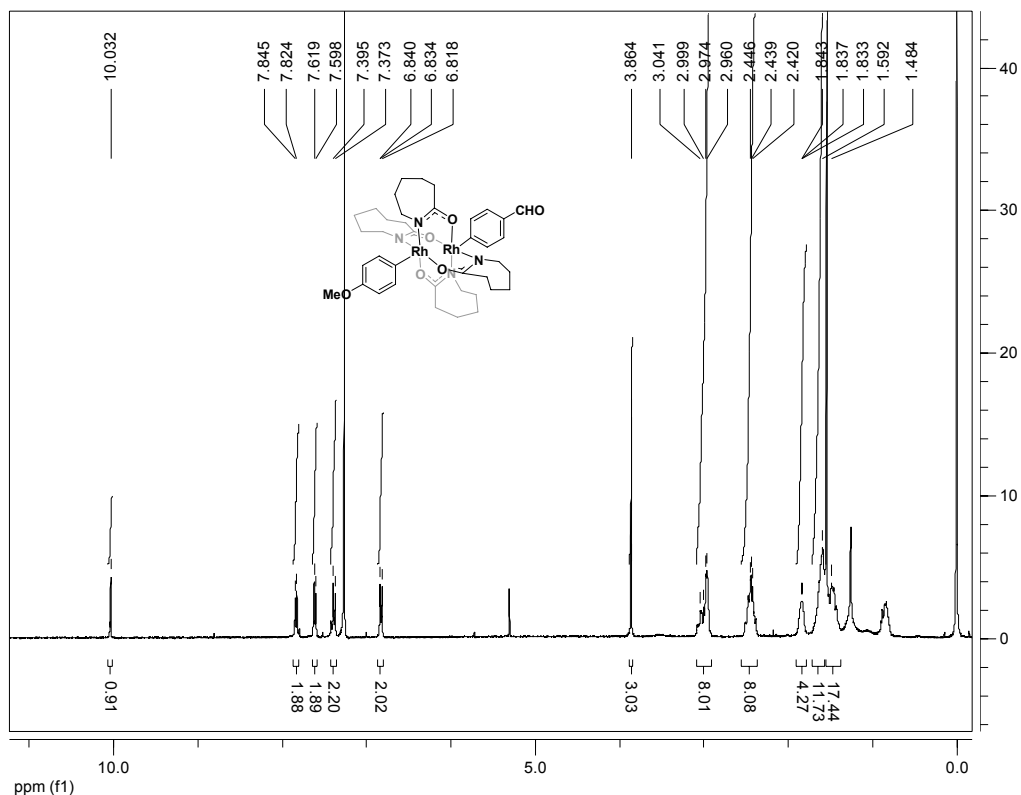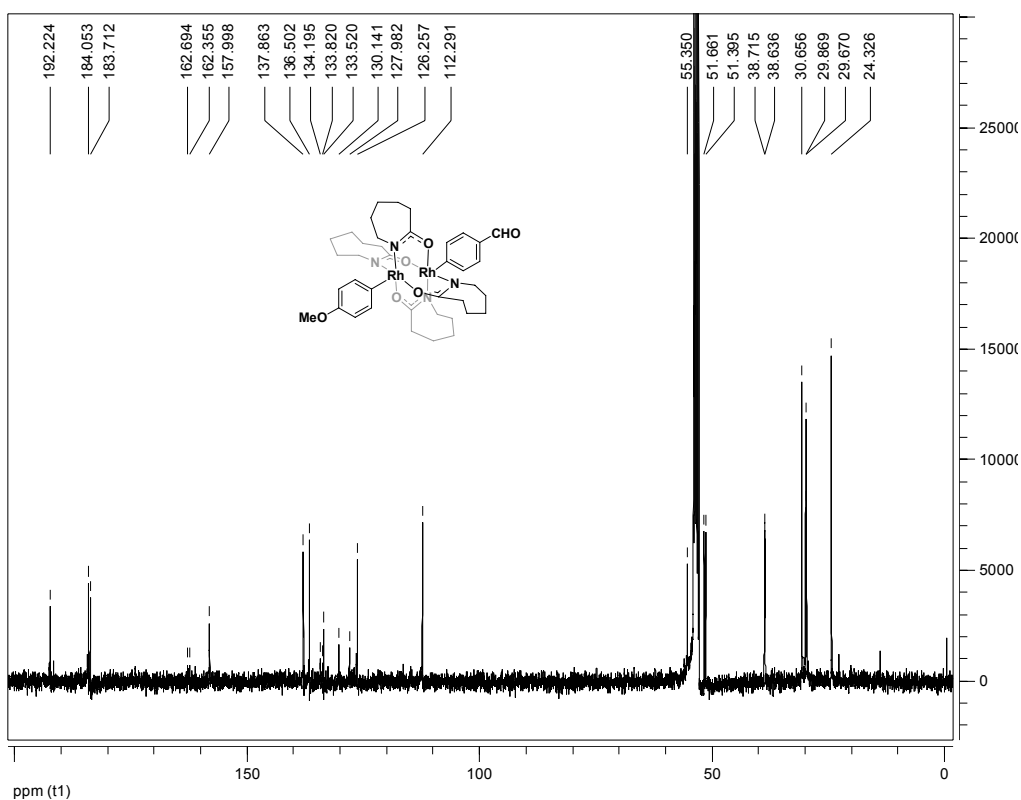

***trans*-{ $\sigma$ -(4-*N,N*-Dimethylaminophenyl)- $\sigma$ -(3-formylphenyl)}-*tetrakis*- $\mu$ -  
(caprolactamato) dirhodium(III) (1m).**

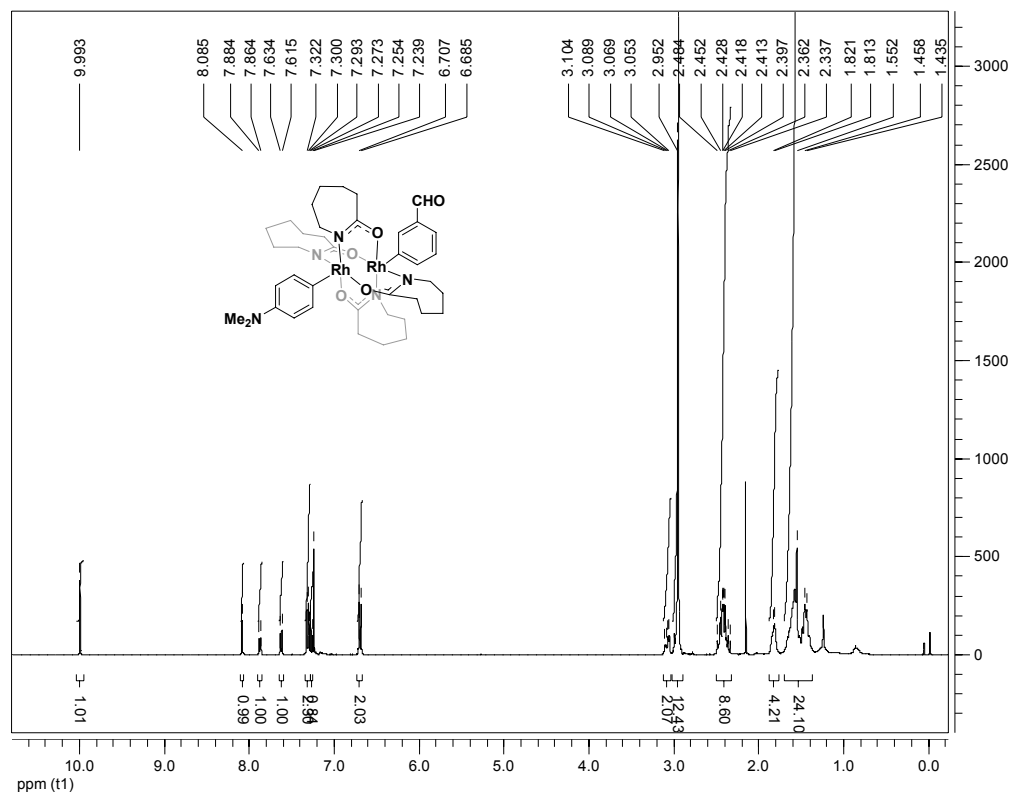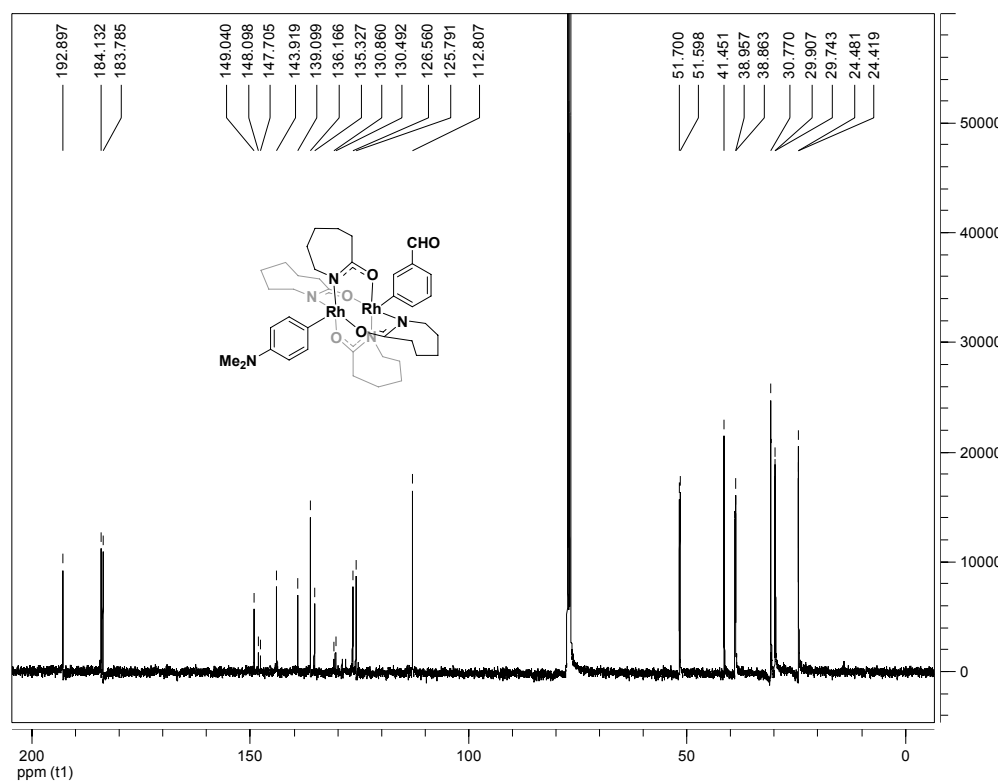

***trans*-( $\sigma$ -4-Trifluoromethylphenyl- $\sigma$ -4-nitrophenyl)-*tetrakis*- $\mu$ -(caprolactamato)  
dirhodium(III) (1n).**

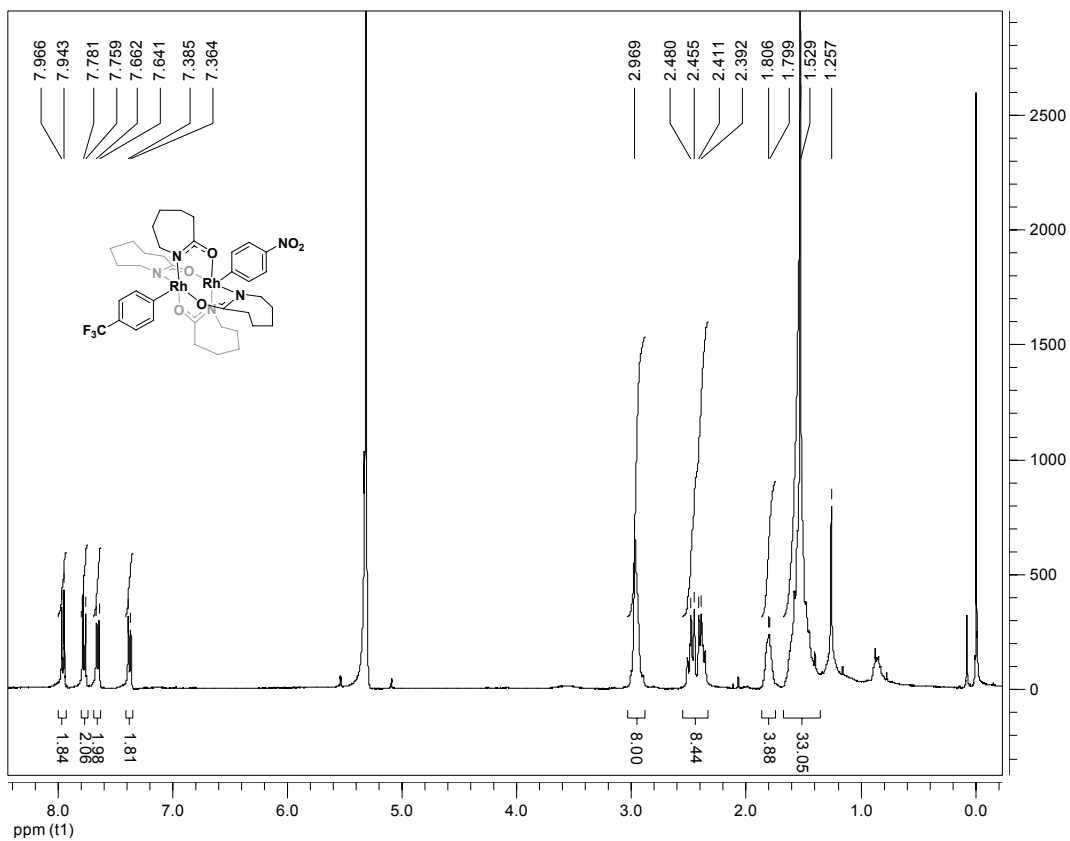

**Representative cyclic voltammograms of hetero-bis( $\sigma$ -aryl)dirhodium(III) caprolactamates (1)**

***trans*-{ $\sigma$ -Phenyl- $\sigma$ -(4-methoxycarbonylphenyl)}-tetrakis- $\mu$ -(caprolactamato) dirhodium(III) (1a).**

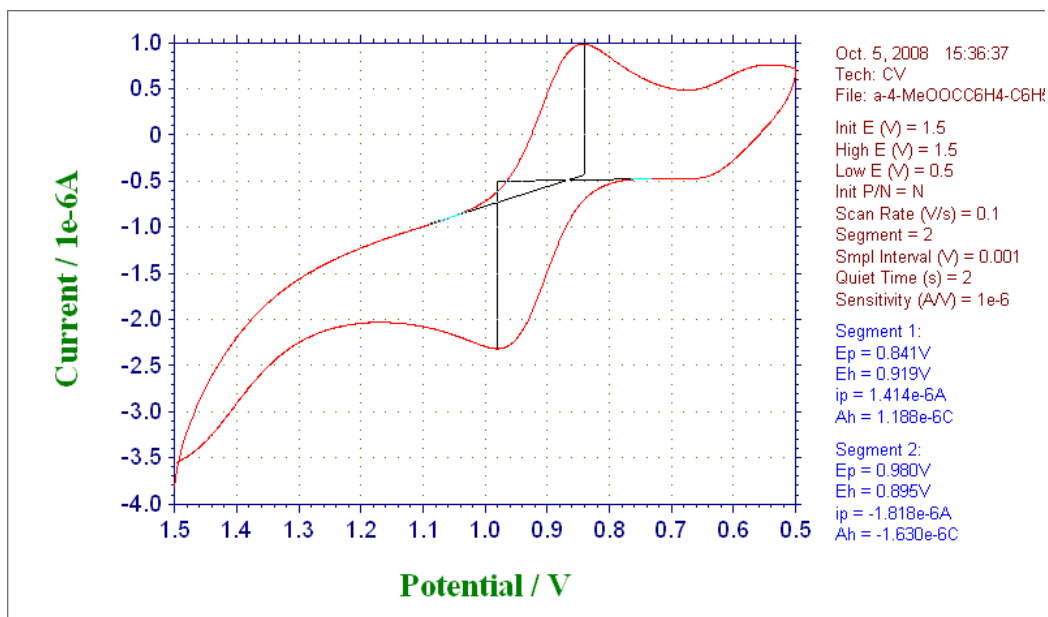

***trans*-{ $\sigma$ -(4-Methylphenyl)- $\sigma$ -(4-methoxycarbonylphenyl)}-tetrakis- $\mu$ -(caprolactamato) dirhodium(III) (1b).**

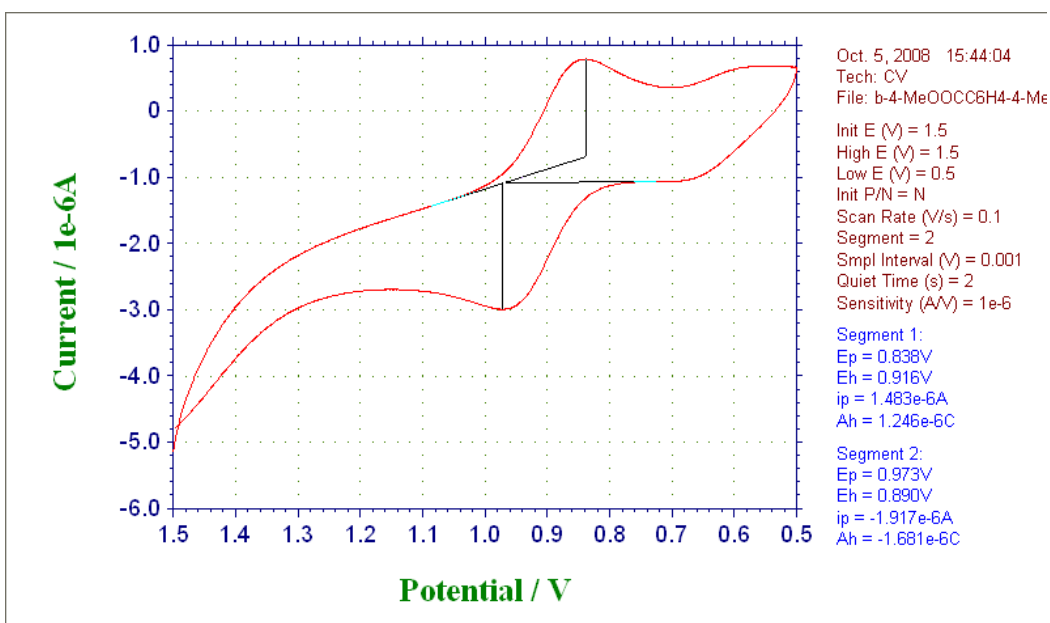



***trans*-{ $\sigma$ -(4-Bromophenyl)- $\sigma$ -(4-methoxycarbonylphenyl)}-*tetrakis*- $\mu$ -  
(caprolactamato) dirhodium(III) (1e).**

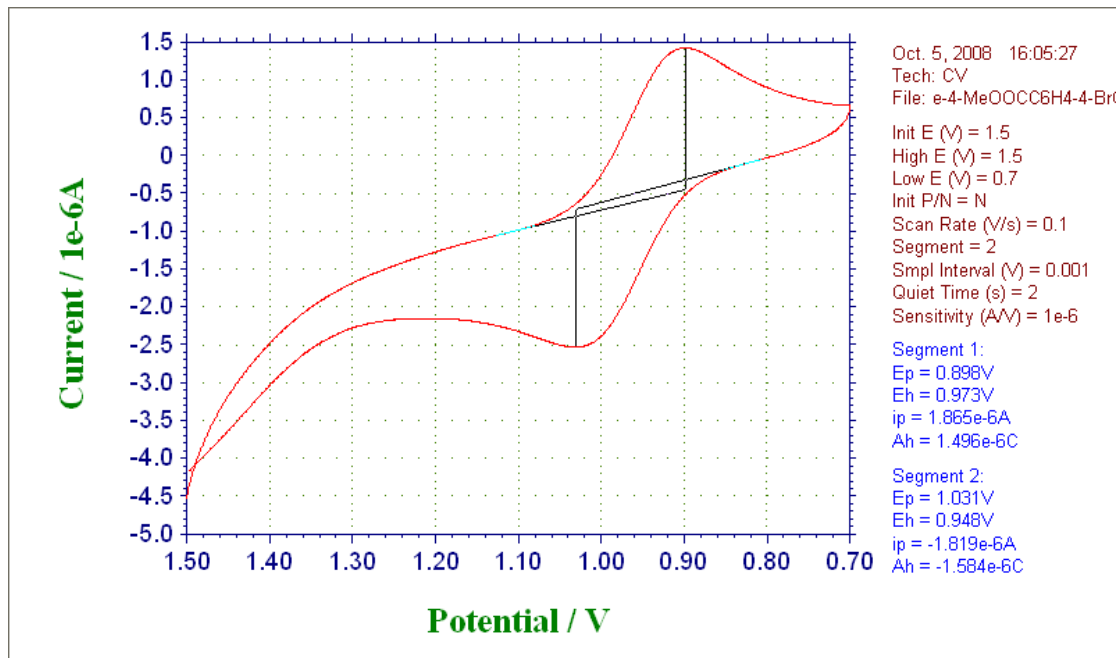

***trans*-{ $\sigma$ -(3-Thienyl)- $\sigma$ -(4-methoxycarbonylphenyl)}-*tetrakis*- $\mu$ -(caprolactamato)  
dirhodium(III) (1f).**

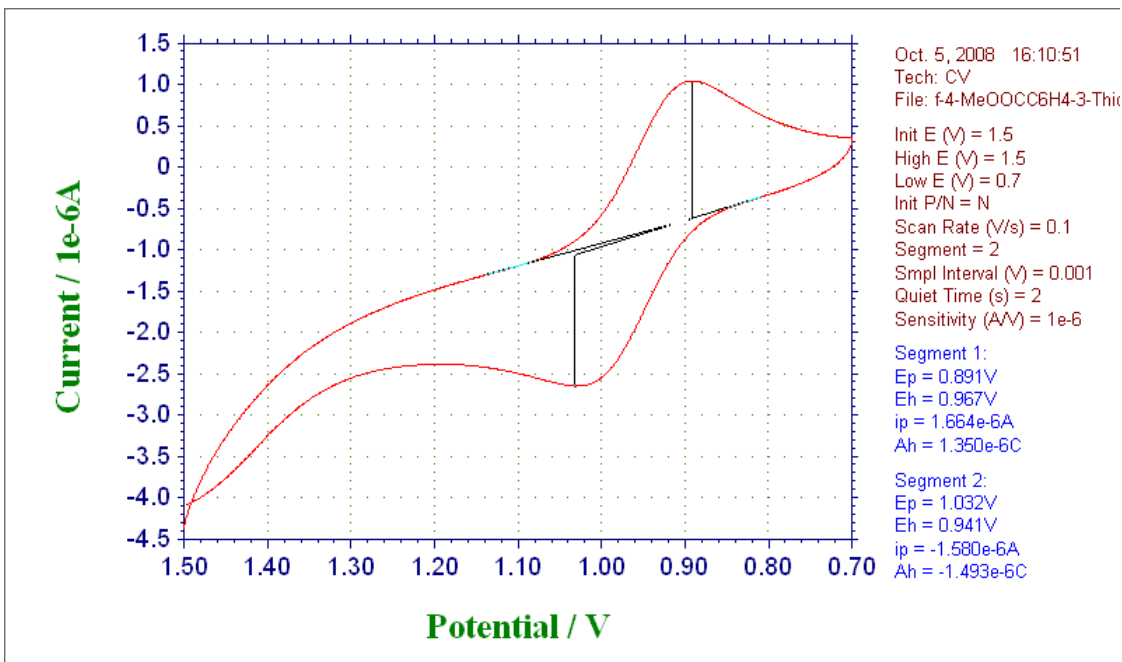

***trans*-{ $\sigma$ -(4-Formylphenyl)- $\sigma$ -phenyl}-*tetrakis*- $\mu$ -(caprolactamato)dirhodium(III)  
(1k).**

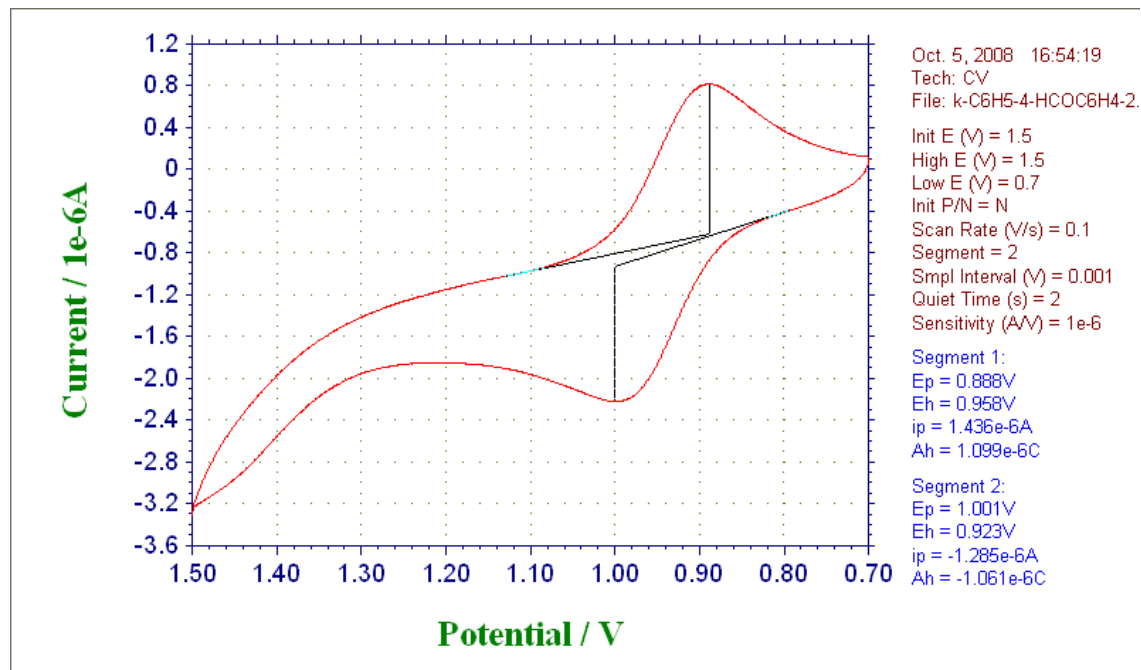

***trans*-( $\sigma$ -4-Trifluoromethylphenyl)- $\sigma$ -4-nitrophenyl)-*tetrakis*- $\mu$ -(caprolactamato)  
dirhodium(III) (1n).**

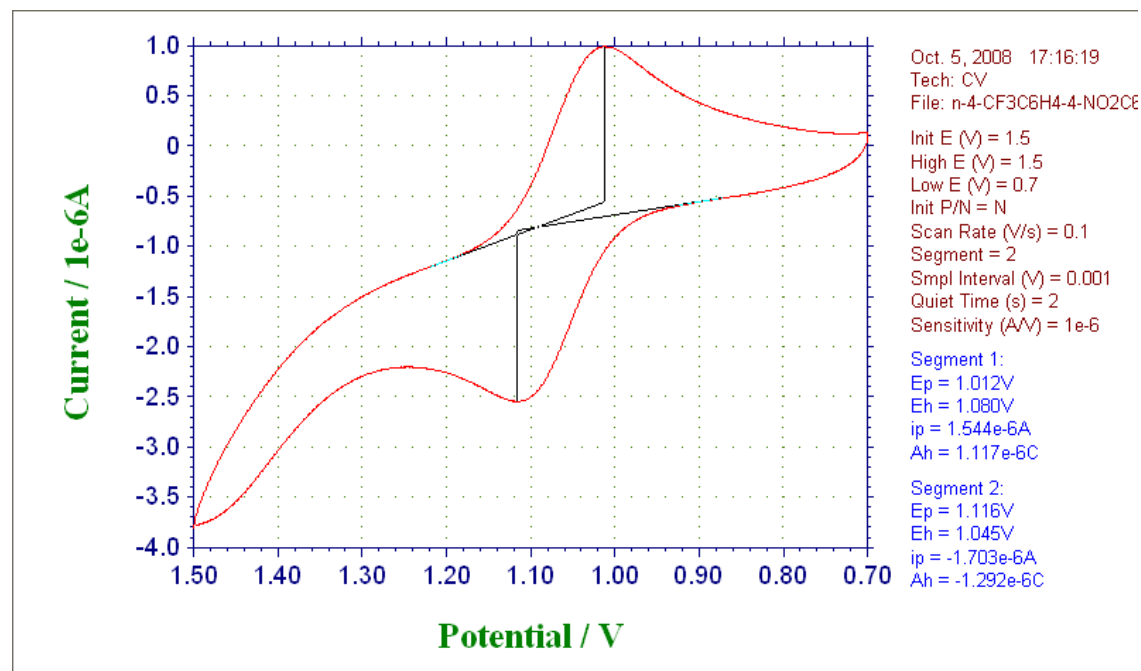

Supplement: b821592h.pdf [file b821592h.pdf]
